# Supplementary material
Source: HighWire-hosted journal article supplement (https://erj.ersjournals.com/content/57/2/2002127)
Supplement: inline-supplementary-material-1 [file inline-supplementary-material-1.pdf]

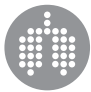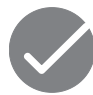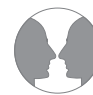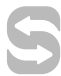

SHAREABLE PDF

# Breath volatile organic compounds and inflammatory markers in adult asthma patients: negative results from the ALLIANCE cohort

Olaf Holz <sup>1,2,14</sup>, Benjamin Waschki <sup>3,4,5,14</sup>, Henrik Watz<sup>5,6</sup>, Anne Kirsten<sup>5,6</sup>, Mustafa Abdo<sup>4,5</sup>, Frauke Pedersen<sup>5,6</sup>, Markus Weckmann <sup>5,7</sup>, Oliver Fuchs <sup>8,9</sup>, Anna-Maria Dittrich<sup>2,10</sup>, Gesine Hansen<sup>2,10</sup>, Matthias V. Kopp<sup>5,7</sup>, Erika von Mutius <sup>9,11</sup>, Klaus F. Rabe<sup>4,5</sup>, Jens M. Hohlfeld <sup>1,2,12,15</sup> and Thomas Bahmer<sup>4,13,15</sup> the ALLIANCE Study Group

**Affiliations:** <sup>1</sup>Fraunhofer ITEM, Hannover, Germany. <sup>2</sup>German Center for Lung Research, BREATH. <sup>3</sup>University Hospital Hamburg-Eppendorf, Department of Cardiology, University Heart and Vascular Center Hamburg, Hamburg, Germany. <sup>4</sup>LungenClinic Grosshansdorf, Grosshansdorf, Germany. <sup>5</sup>German Center for Lung Research, ARCN. <sup>6</sup>Pulmonary Research Institute at LungenClinic Grosshansdorf, Grosshansdorf, Germany. <sup>7</sup>Division of Pediatric Pulmonology and Allergology, University Children's Hospital, Luebeck, Germany. <sup>8</sup>Dept of Paediatric Respiratory Medicine, Inselspital, University Children's Hospital of Bern, University of Bern, Bern, Switzerland. <sup>9</sup>German Center for Lung Research, CPC-M. <sup>10</sup>Dept of Paediatric Pneumology, Allergology and Neonatology, Hannover Medical School, Hannover, Germany. <sup>11</sup>Dr von Hauner Children's Hospital, Ludwig Maximilians University, Munich, Germany. <sup>12</sup>Department of Respiratory Medicine, Hannover Medical School, Hannover, Germany. <sup>13</sup>University Hospital Schleswig-Holstein, Campus Kiel, Internal Medicine Department I, Pneumology, Kiel, Germany. <sup>14</sup>O. Holz and B. Waschki contributed equally. <sup>15</sup>J.M. Hohlfeld and T. Bahmer contributed equally.

**Correspondence:** Olaf Holz, Fraunhofer ITEM, Clinical Airway Research, Nikolai-Fuchs-Str. 1, Hannover 30625, Germany. E-mail: olaf.holz@item.fraunhofer.de

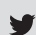

@ERSpublications

Despite recent publications, we are not close to finding a clinically valuable breath VOC biomarker for asthma or asthma phenotypes <https://bit.ly/3heTgtK>

**Cite this article as:** Holz O, Waschki B, Watz H, *et al.* Breath volatile organic compounds and inflammatory markers in adult asthma patients: negative results from the ALLIANCE cohort. *Eur Respir J* 2021; 57: 2002127 [<https://doi.org/10.1183/13993003.02127-2020>].

This single-page version can be shared freely online.

## To the Editor:

“Breathomics” in asthma is a rapidly growing area of significant scientific interest, as indicated by a recently published review, two research articles, and their accompanying editorials in high impact pneumology journals [1–5]. The repeatedly observed associations between breath volatile organic compounds (VOCs) and sputum or blood inflammatory cells [2, 3] suggest that breathomics are on the brink of introduction as a valuable clinically tool. However, there are also major concerns about unresolved methodological issues and a general paucity of high-quality data [1, 6]. In this letter we detail our concerns with breathomics based on data from a cohort of adult asthma patients with a broad spectrum of clinical phenotypes.
